# Supplementary material for: Age-Related Task Sensitivity of Frontal EEG Entropy During Encoding Predicts Retrieval
Source: Springer Nature journal article supplement (doi:10.1007/s10548-013-0278-x), 2013-03-16
Supplement: MOESM1 [file 10548_2013_278_MOESM1_ESM.zip]

Age-related Task Sensitivity of Frontal EEG Entropy  
during Encoding predicts Retrieval  
Supplementary Materials

Denis O'Hora    Stefan Schinkel    Michael J. Hogan    Liam Kilmartin    Michael Keane  
                         Robert Lai                   Neil Upton

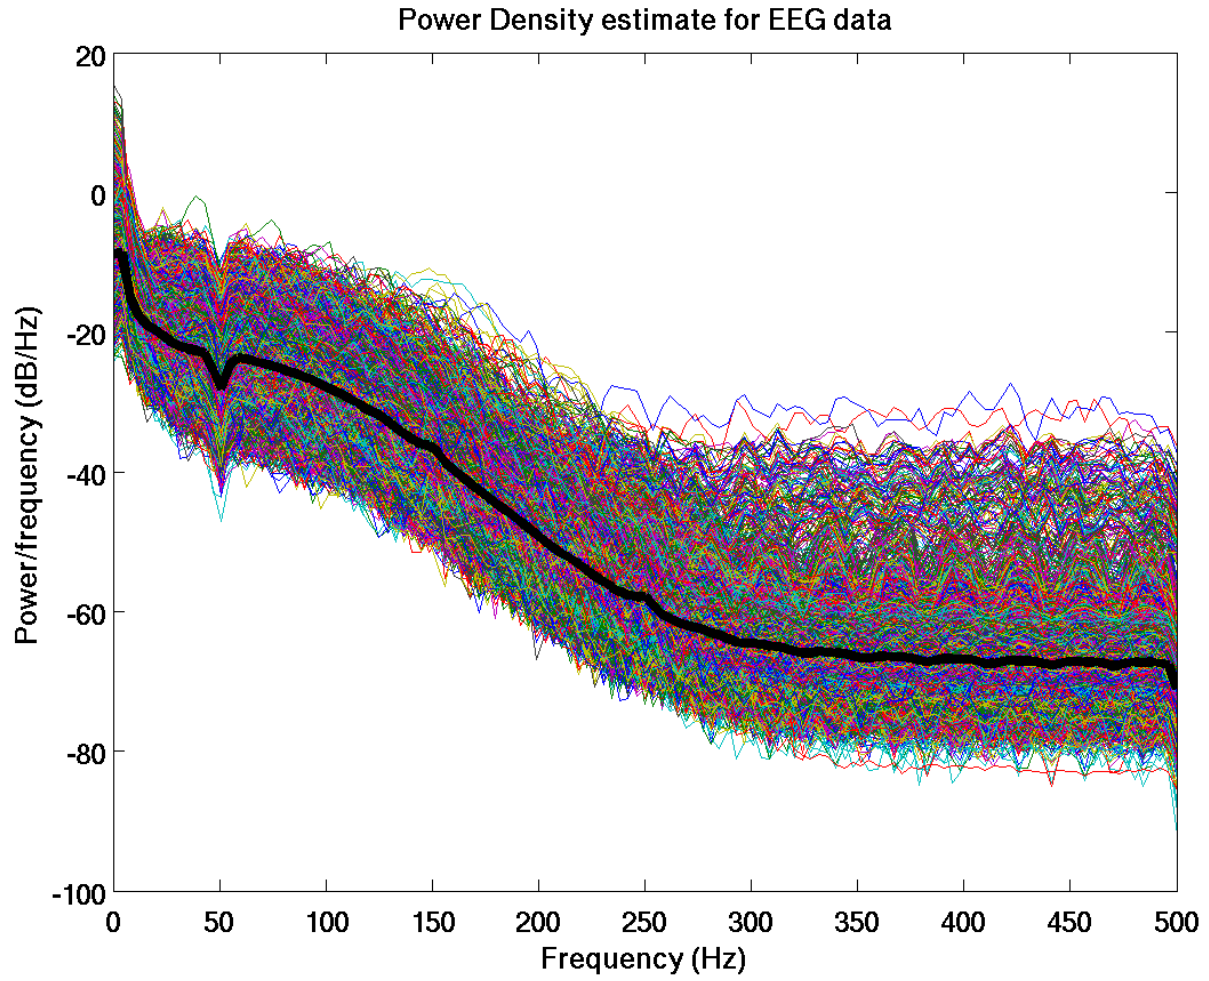

Figure 1: Estimated power spectrum of EEG data used for analysis, computed for each channel in each subject. Average in bold line.

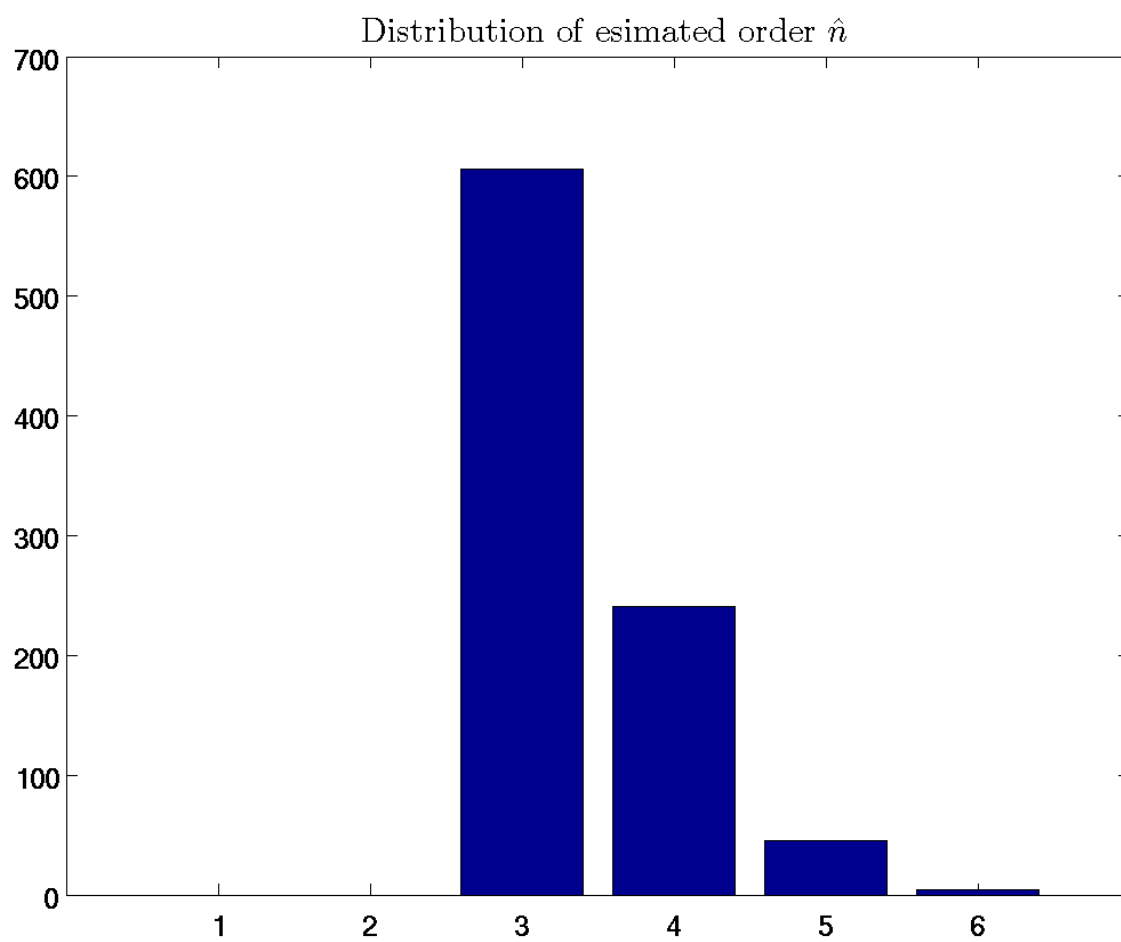

Figure 2: Estimated order of the EEG used for analysis,computed for each channel in each subject.

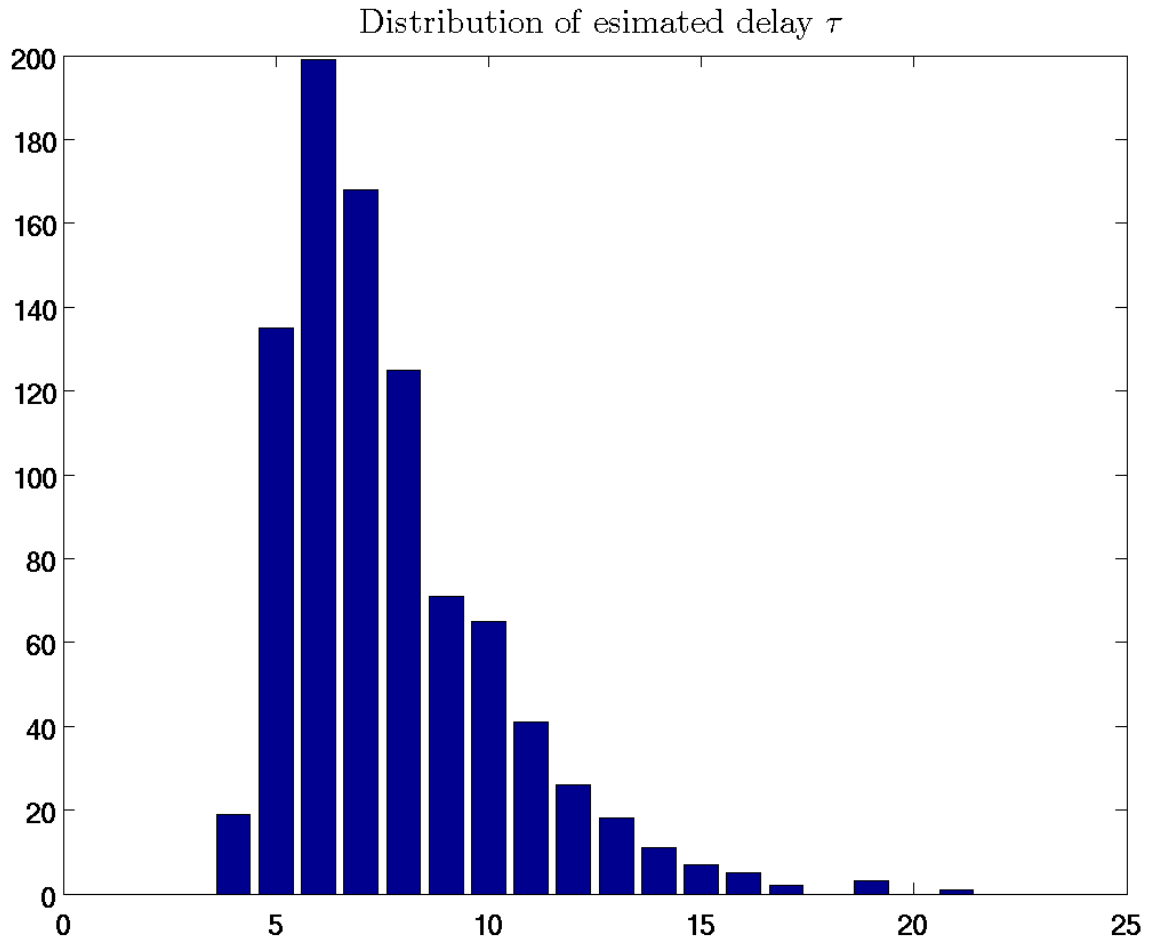

Figure 3: Estimated delay ( $\tau$ ) of the EEG used for analysis, computed for each channel in each subject.

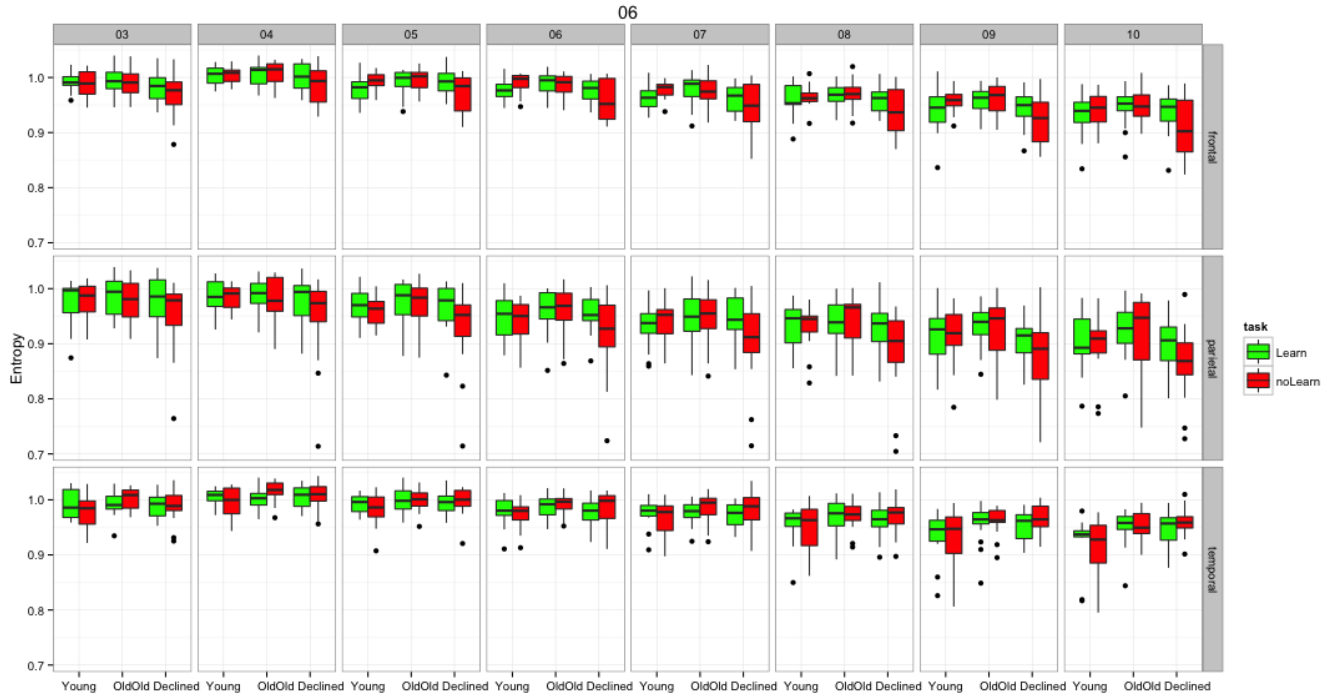

Figure 4: PermEN as a function of the delay for Dimension 06

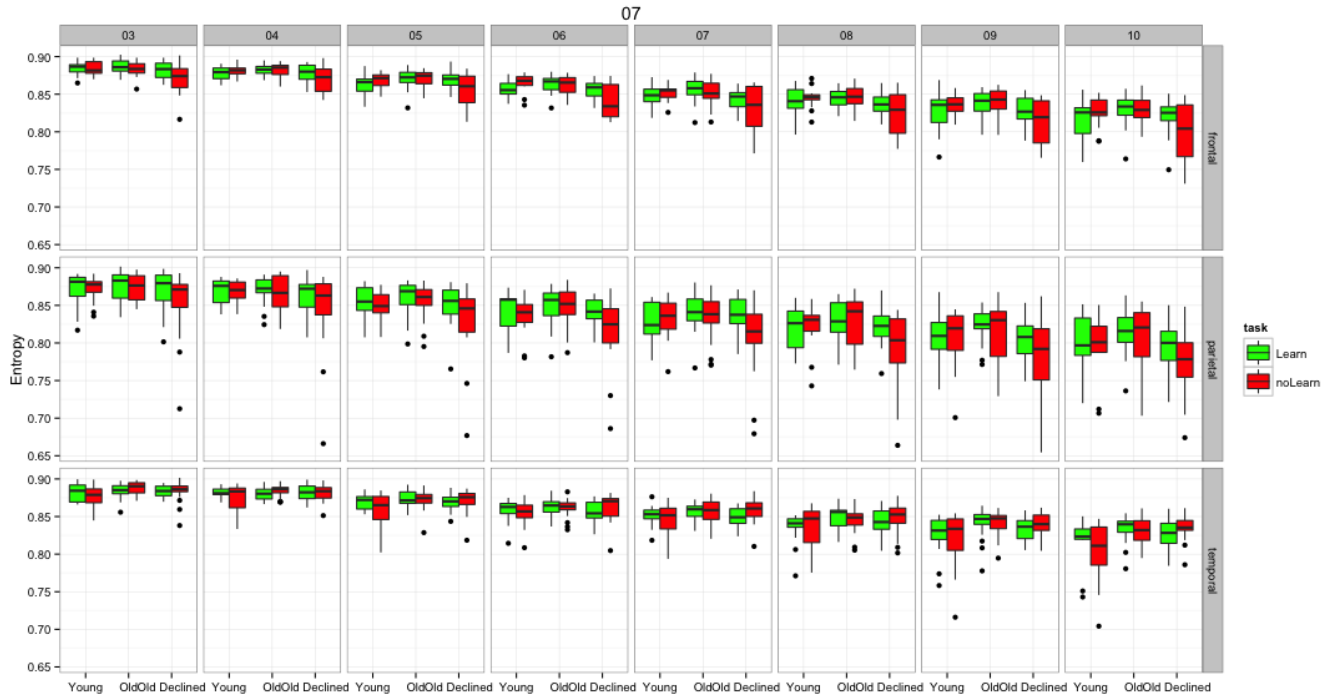

Figure 5: PermEN as a function of the delay for Dimension 07

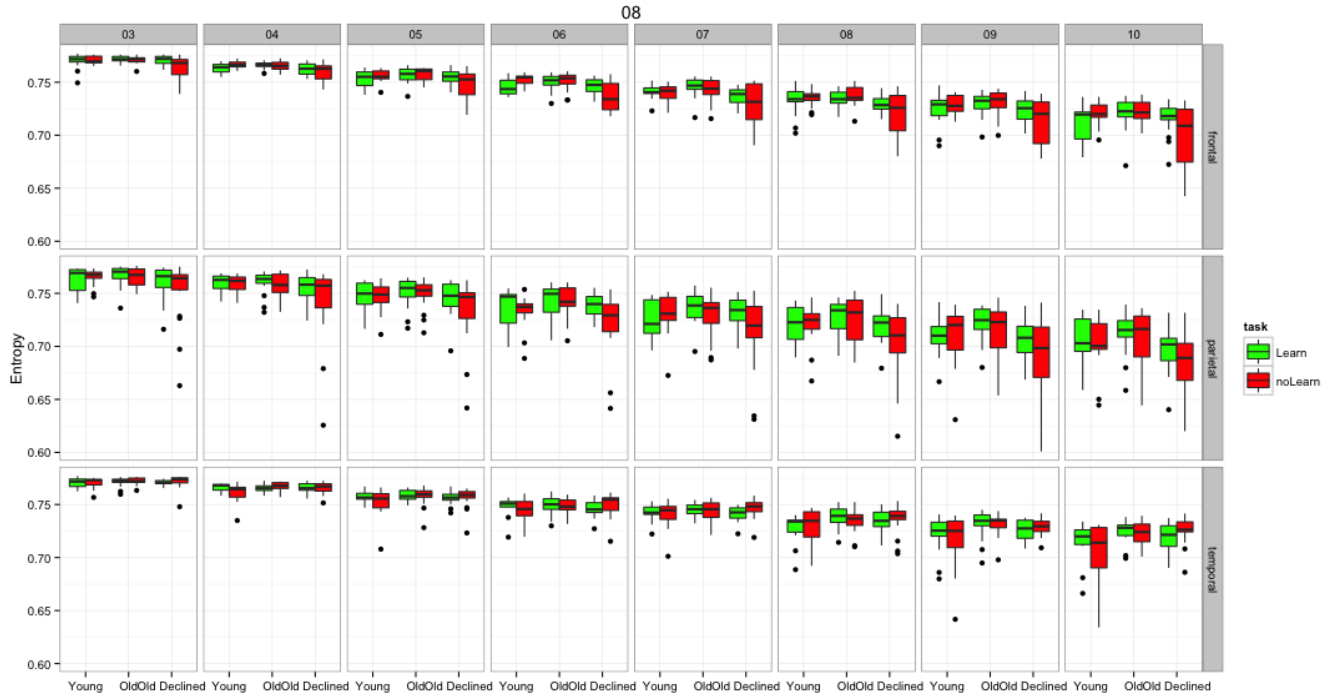

Figure 6: PermEN as a function of the delay for Dimension 08

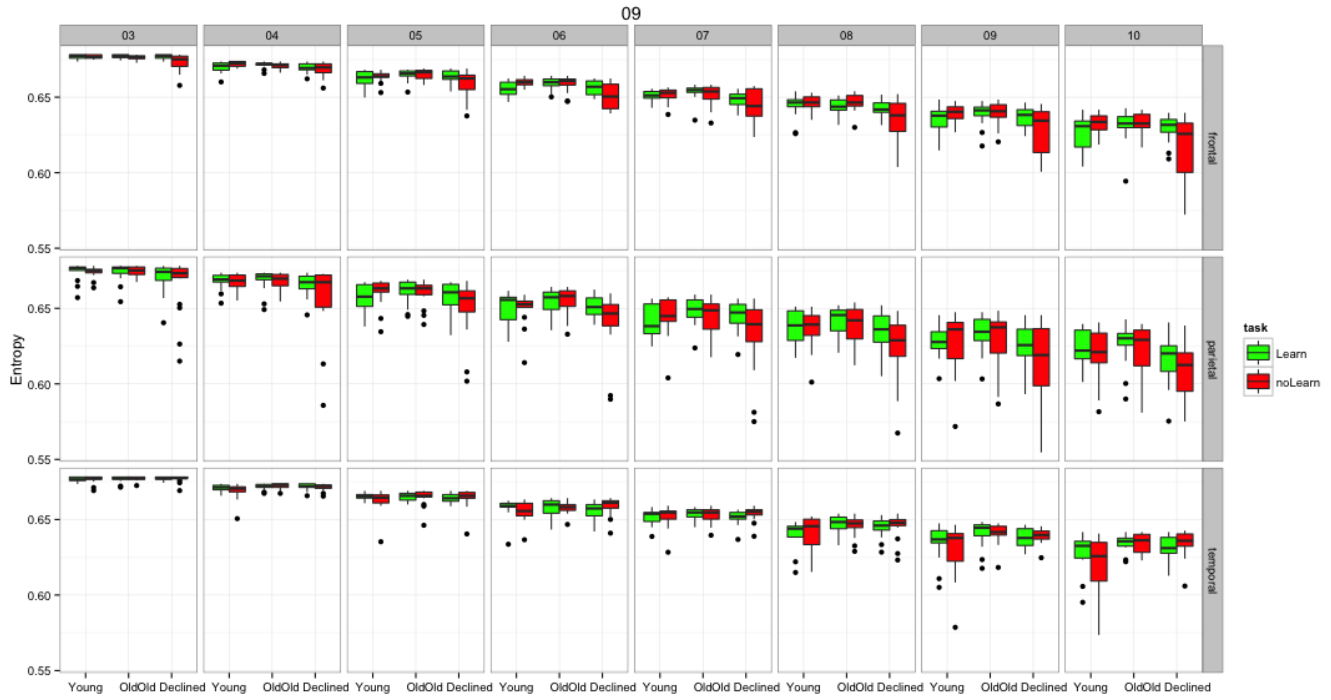

Figure 7: PermEN as a function of the delay for Dimension 09

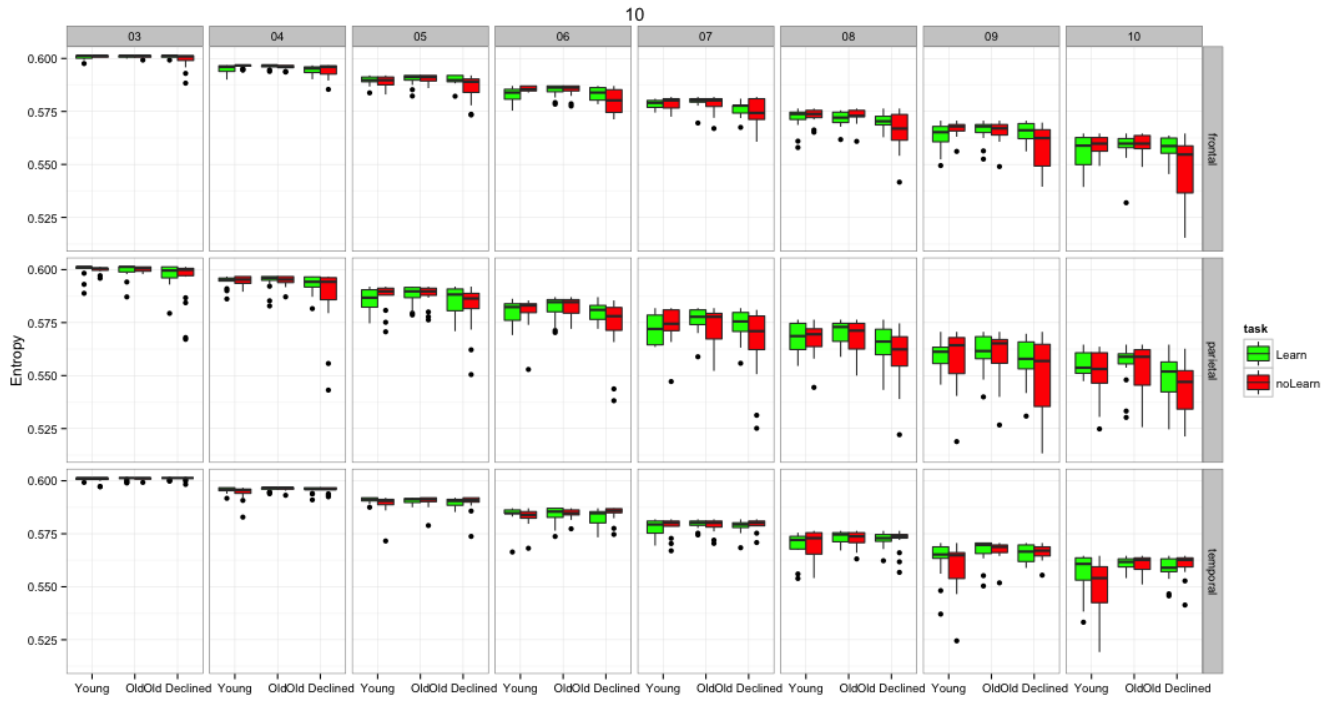

Figure 8: PermEN as a function of the delay for Dimension 10
